**Title: Rapid self-selecting and clone-free integration of transgenes into engineered CRISPR safe harbor locations in *Caenorhabditis elegans***

Authors: Zachary C. Stevenson<sup>\*†</sup>, Megan J. Moerdyk-Schauwecker<sup>\*†</sup>, Brennen Jamison<sup>†</sup>, Patrick C. Phillips<sup>†</sup>.

<sup>\*</sup>These authors contributed equally to this work

<sup>†</sup>Institute of Ecology & Evolution, University of Oregon

**Running Title: Split Selection Clone Free Integration**

**Keywords/phrases: CRISPR, *C. elegans*, Safe Harbor, Clone Free, Transformation**

**Corresponding Author Information:** Patrick C. Phillips Institute of Ecology and Evolution and Department of Biology, 5289 University of Oregon, Eugene, OR 97403. E-mail: [pphil@uoregon.edu](mailto:pphil@uoregon.edu)

# **Abstract:**

Precision genome editing for model organisms has revolutionized functional analysis and validation of a wide variety of molecular systems. To date, the capacity to insert transgenes into the model nematode *Caenorhabditis elegans* has focused on utilizing either transposable elements or CRISPR-based safe harbor strategies. These methods require laborious screening processes that often result in false positives from heritable extrachromosomal arrays or rely on co-CRISPR markers to identify likely edited individuals. As a result, verification of transgene insertion requires anti-array selection screening methods or extensive PCR genotyping respectively. These approaches also rely on cloning plasmids for the addition of transgenes. Here, we present a novel safe harbor CRISPR-based integration strategy that utilizes engineered insertion locations containing a synthetic guide RNA target and a split-selection system to eliminate false positives from array formation, thereby providing integration-specific selection. This approach allows the experimenter to confirm an integration event has taken place without molecular validation or anti-array screening methods, and is capable of producing integrated transgenic lines in as little as five days post-injection. To further increase the speed of generating transgenic lines, we also utilized the *C. elegans* native homology-based formation of extra-chromosomal arrays to assemble transgenes *in-situ*, removing the cloning step. We show that complete transgenes can be made and inserted into our split-selection safe harbor locations starting from PCR products, providing a clone-free and molecular-validation-free strategy for single-copy transgene integration. Overall, this combination of approaches provides an economical and rapid system for generating highly reproducible complex transgenics in *C. elegans*.

# **Introduction:**

The introduction of transgenes is a staple in the molecular biologist's toolkit, with a broad range of utilities including expression of individual variants, ectopic expression of tagged native genes, and the addition of genes from other species. Injection of double-strand DNA into the *Caenorhabditis elegans* gonad arm generally results in assembly of these fragments via regions of microhomology, leading to the formation of extrachromosomal arrays (Stinchcomb *et al.* 1985; Mello *et al.* 1991). These extrachromosomal array structures can be in excess of 1 Mbp and contain up to hundreds of copies of the injected gene (Mello *et al.* 1991; Woglar *et al.* 2019). Extrachromosomal arrays are not stably inherited—either between cells within an individual or between generations—and have variable expression levels, which can be problematic depending on the biological question. To avoid the stochastic element of array expression, it is often desirable to integrate transgenes. Historically in *C. elegans*, microparticle bombardment (Praitis *et al.* 2001) and ultraviolet light exposure (Evans 2006) or gamma exposure (Mello and Fire 1995). have been used to integrate transgenes randomly. However, these methods are less than ideal as: integration usually results in multiple copies, which can impact expression; the integration location is random which can disrupt native genes expression or insert the transgene into regions prone to transcriptional silencing; and both methods require expensive and specialized equipment to create transgene integrations and to identify the loci of insertion. More recent approaches have utilized transposon-based integration methods such as MosSCI and miniMos (Frøkjær-Jensen *et al.* 2008, 2014), which use a transposon to create a double-strand break, allowing for single transgene integration into a predefined or random region respectively. Recently, CRISPR/Cas9 techniques have been adopted for transgene integration. This includes generalized methods for transgenic cargo insertion, either with or without a selective marker

such as Hygromycin B resistance (Radman *et al.* 2013) or a self-excising cassette (SEC) (Dickinson *et al.* 2015; Kasimatis *et al.* 2018). More specialized CRISPR strategies, such as the SKI LODGE method, facilitates tissue-specific expression by splitting the coding and promoter element (Silva-García *et al.* 2019). A particular advantage of this latter strategy is that it introduces modular transgene integration, allowing for a more straightforward integration into a backbone of standard genetic elements that are pre-integrated within a safe harbor location.

Regardless of whether a transposon or CRISPR/Cas9 strategy is used, integration of the transgene by homology-directed repair (HDR) is generally inefficient compared to non-homologous end joining (NHEJ) (Frøkjær-Jensen *et al.* 2008; Dickinson *et al.* 2013, 2015; Ward 2015). Both MosSCI and CRISPR show approximately the same integration efficiencies which varies greatly depending on the transgene. CRISPR and MosSCI also require robust screening methods to identify the rare correct transgene integration. Co-CRISPR simultaneously targets a second gene to generate a visible dominant phenotype (e.g., *dpy-10*) (Arribere *et al.* 2014), thereby allowing identification of a sub-population with active Cas9 expression and genome targeting. This enriched population must then be further screened, generally by PCR and Sanger sequencing, to identify correct integration events at the desired locus. In the case of selectable genes, the transgene generates a visible phenotype displayed not only by integrants but also individuals with heritable extrachromosomal arrays. This is because the injected donor homology contains a fully functional copy of the selectable gene. Distinguishing extrachromosomal arrays from integration events requires anti-array selection techniques such as heat shock induction of peel, a toxic transgene (Seidel *et al.* 2011; Frøkjær-Jensen *et al.* 2012) and visual screening for loss of an additional gene used to mark the array (e.g., fluorescent protein or *rol-6*). These

methods are imperfect and molecular methodologies such as genotyping PCRs must be used to verify genuine integrations. Currently, no method is available for *C. elegans* that provides integration-specific selection of transgenes. Such an approach would reduce the labor required to generate transgenics by eliminating false positives caused by extrachromosomal array formation, fitting into the category of a “screen from heaven” where only the desired transgenic integrant is alive on the petri dish (Jorgensen and Mango 2002).

In most cases, transgenes must be cloned into plasmids with homology arms matching the targeted genomic region for single-copy integration. This process requires laborious cloning strategies for each desired transgene. *C. elegans* can recombine fragments with microhomology and express resulting transgenes in an array (Mello *et al.* 1991; Kemp *et al.* 2007). Others have tested this strategy to create a donor homology for transgene integration. For example, Paix *et al.* (2016) and Philip *et al.* (2019) attempted to overcome the cloning obstacle by integrating transgenes with overlapping PCR fragments that, once recombined *in-situ*, should produce a functional gene. However, neither method provides direct selection for the transgene integration. As such, depending on the design, array formation can provide false-positives, increasing the difficulty of identifying a correct assembly and integration—a notable complication for current ‘clone-free’ strategies.

Here, we present a novel transgene integration strategy that utilizes a custom-designed safe harbor location to eliminate many of the steps required to go from concept-to-integrated transgene. Our approach removes the selective advantage from the array and selects only for the integration event by splitting the coding sequence for Hygromycin B resistance. Additionally, we

show the cloning stage can be bypassed in this system, utilizing the worms' native homology mediated repair to clone our transgene *in-situ*. Coupling these methods can reduce the labor and time required to produce a transgenic nematode, allowing the experimenter to go from PCR-to-integrated transgene in approximately one week.

## Materials and Methods

### *Strains and growth conditions*

Bristol N2-PD1073 (Yoshimura *et al.* 2019) and the derived strains PX692, PX693, PX694, PX695, PX696, and PX697 (Table S1) were maintained on NGM-agar plates seeded with OP50 or HB101 *Escherichia coli* at 15°C unless otherwise noted.

### *Molecular biology*

All plasmids unique to this publication are listed in Table S2, and all primers used in this study are listed in Table S3. All-in-one-plasmids encoding both Cas9 and the desired sgRNA were created by site-directed mutagenesis of pDD162 (Addgene #47549) (Dickinson *et al.* 2013) using the Q5 site-directed mutagenesis kit (NEB) per manufacturer directions. Guide and Cas9 sequences were confirmed by Sanger sequencing. The guide targeting Chromosome II:8420188-8420210 has been previously described, and the constructed plasmid (pMS8) is equivalent to pDD122 (Addgene #47550) (Dickinson *et al.* 2013). Synthetic guide sites utilized in the landing pads were based on guides previously shown to be highly efficient in other species or generated based on predicted efficiency scores (Table 1). Predicted off-target effects were determined using the method of (Doench *et al.* 2016) while predicted on-target efficiency was calculated using Sequence Scan for CRISPR (Xu *et al.* 2015) and the method of (Hsu *et al.* 2013).

139  
140 Repair template plasmids were assembled from overlapping fragments using the NEBuilder HiFi  
141 Kit (NEB) per manufacturer instructions. For the landing pads, the *Cbr-unc-119* rescue gene and  
142 a portion of the homology arms containing the guide site were removed from pCFJ151(Addgene  
143 #19330) (Frøkjær-Jensen *et al.* 2008) and replaced with a multiple cloning site to create pMS2.  
144 The SEC from pDD285 (Addgene #66826) (Dickinson *et al.* 2015) was then inserted into SacI  
145 digested pMS2 to create pMS4. The C-terminal portion of the hygromycin resistance gene and  
146 the *unc-54* 3' UTR were then independently amplified from pCFJ1663 (Addgene #514840 from  
147 the lab of Erik Jorgensen) and inserted into the SbfI site of pMS4 to create the final landing pad  
148 plasmids (pMS70-75). The six synthetic guide sites were included in the primers used to amplify  
149 the hygromycin resistance fragment (Table 1, Table S2, and Table S3). A complete annotated  
150 sequence of pMS74 can be found in Figure S1.

151  
152 To generate an *rpl-28p::mKate2::unc-54* 3'UTR reporter, *rpl-28p* amplified from pBCN39-R4R3  
153 (Addgene #34914) (Semple *et al.* 2012) and the mKate2 coding sequence and *unc-54* 3'UTR  
154 amplified from pDD285 were inserted into SacI digested pMS2 to give pMS12. The reporter was  
155 then amplified from pMS12 and inserted into an intermediate construct containing: *rps-0p* and  
156 the N-terminal fragment of the hygromycin resistance gene from pCFJ1663 (amplified in two  
157 fragments to remove intron), a pUC57 backbone, a truncated 5' genomic homology arm from  
158 pMS2 and artificial sequences; to give the final insertion vector pMS81. A complete annotated  
159 sequence of pMS81 can be found in Figure S2. A second split hygromycin insertion vector,  
160 pZCS52, was made by amplifying the homology arms and split hygromycin from pMS81 by  
161 PCR and adding the *sqt-1(e1350)* gene amplified from pDD285.

To generate an additional fluorescent co-marker, *eft-3p* and *tbb-2* 3' UTR amplified from pDD162 and wrmScarlet amplified from pSEM89 (Bindels *et al.* 2016; Mouridi *et al.* 2017) were cloned into a pUC19 backbone to give pZCS16. The CRE expressing plasmid pZCS23 was made by PCR amplifying the backbone, *eft-3p* and *tbb-2* 3' UTR from pZCS16 and adding *NLS::CRE* from synthetic gBlocks (IDT).

### ***Strain generation by CRISPR/Cas9***

A mixture consisting of 50 ng/μl pMS8, 10 ng/μl of the appropriate landing pad plasmid and 2.5 ng/μl pCFJ421 (Addgene #34876) (Frøkjær-Jensen *et al.* 2012) was microinjected into the gonad of young adult N2 hermaphrodites. Screening and removal of the SEC were done following Dickinson *et al.* (2015). Presence of the insertion and removal of the SEC was confirmed by PCR and Sanger sequencing (Table S3). Confirmed transgenics were backcrossed once to N2 to create the final strains PX692-PX697 (Table 1, Table S1).

### ***Quantification of synthetic guide RNA efficiency***

For each landing pad strain (PX692-PX697), a mixture consisting of 50 ng/μl of all-in-one plasmid targeting the corresponding synthetic guide site and 10 ng/μl pMS81 was microinjected into the gonad of young adult hermaphrodites. Following injection, all worms were maintained at 25°C for the duration of the experiment. Injections were performed until approximately 60 broods per strain had at least one F1 progeny expressing the fluorescent donor homology, thereby marking the brood as successfully injected. Broods were screened for fluorescence at approximately 48h post-injection (hpi), and all fluorescent individuals were counted regardless of developmental stage (Figure S3). Hygromycin B was then top spread to plates at a final



concentration of 250 µg/ml and plates were then screened starting five days later for resistant progeny. Individuals from surviving broods were PCR screened to confirm correct integration.

### ***Removal of the hygromycin selectable marker with CRE***

A confirmed homozygous integrant line for *rpl-28p::mKate2::unc-54 3'UTR* was injected with 10ng/µl of CRE expression plasmid pZCS23 and 10ng/µl pCFJ421 co-marker. 30 co-marker positive F1 individuals were screened by PCR for the removal of the hygromycin gene. F2 progeny from 3 of the most promising candidates were then rescreened to confirm homozygous removal.

### ***In-situ assembly for integrated transgenes***

Two or six PCR fragments with 30bp overlaps, covering the *sqt-1(e1350)* gene, were amplified from pDD285 using Q5 polymerase (NEB) per manufacturer instructions. Homology arms with 30bp overlaps to the *sqt-1(e1350)* gene were similarly amplified from pMS81. These homology arms were then complexed with the adjoining *sqt-1(e1350)* PCR fragment through a second round of PCR.

For *in-situ* assembly and integration, a mixture consisting of 50ng/µl pMS79, 5ng/µl pZCS16, and 40fmol/µl of each of the appropriate gel purified PCR products was microinjected into the gonad of young adult PX696 worms. As a control, 10 ng/µl pZCS52 was substituted for the PCR products. Following injection, all worms were maintained at 25°C for the duration of the experiment. After 24 hours, injected adults were moved to new plates to facilitate counting. F1 individuals were screened for red fluorescence (Figure S4) and the roller phenotype at 3-4 days post-injection. Hygromycin B was then added to plates at a final concentration of 250 µg/ml. Each day for five days post-exposure, plates were scored for hygromycin resistance. Individuals resistant to hygromycin and with the roller phenotype were singled without hygromycin and screened for Mendelian inheritance of the roller phenotype to indicate an integration event. Lines

with promising candidates for single copy-integration were singled until they produced homozygous *rol* progeny, which were then screened for the presence of the wrmScarlet co-marker, genotyped by PCR across the insert and Sanger sequenced for correct transgene assembly and integration (Table S3).

### ***Accessibility of reagents and protocols***

pMS4, pMS74, PMS79, pMS81, and pZCS16 are available from Addgene. Strain PX696 is available from the *Caenorhabditis* Genetics Center. Other strains and plasmids are available upon request. Full protocols and all plasmid sequences are available on the lab website ([github.com/phillips-lab/SLP](https://github.com/phillips-lab/SLP)). All data files associated with this manuscript are available on FigShare.

## **Results**

### ***Generation of synthetic split landing pad sites***

Current methods of transgene insertion in *C. elegans* result in a large number of false positives requiring additional phenotypic or PCR screening or anti-array selection. We sought a faster and simpler method by using CRISPR/Cas9 genome engineering to custom-designed synthetic split landing pads (SLPs). A split uracil selection system has been developed for yeast, whereby a functional *URA3* gene is reconstituted by an integration event. Therefore only transgenic cells survive in the absence of uracil (Levy et al. 2015). We reasoned a similar system could be adapted to *C. elegans*. Hygromycin resistance was chosen as the selectable event as it works across *C. elegans* strains, provides more substantial selection than other antibiotic resistance genes, and does not rely on mutant backgrounds such as with *unc-119* rescue (Radman et al. 2013). An artificial guide site plus the 3' hygromycin coding sequence and transcription terminator were integrated into the target genome site as part of the SLP, whereas the promoter

and 5' portion of the hygromycin coding sequence were included in the repair plasmid (Figure 1A). A central 500bp region was included in both fragments, allowing for homology-directed repair. Since a complete resistance gene is not present in either the insertion strain or extrachromosomal arrays containing the repair plasmid, only individuals with proper homology-directed repair have a functional hygromycin resistance gene and survive hygromycin exposure (Figure 1B-D).

The SLP was inserted at Chromosome II:8,420,157. Both this general region and this specific CRISPR site have been shown to be permissive for gene expression, including germline expression (Frøkjær-Jensen *et al.* 2008, 2012; Dickinson *et al.* 2015). The SLP was introduced using the SEC selection method, and removal of the SEC left a LoxP site downstream of the hygromycin resistance gene terminator (Figure 1A). By also including a LoxP site upstream of the promoter in the repair template, this allows for optional removal of the HygR gene in confirmed integrants by injection of a CRE expressing plasmid (Figure S5).

### ***Efficiency of transgene integration***

Given that the SLP is entirely artificial, the guide site can be of the experimenter's choosing. As previous work has shown that the choice of guide site can influence integration efficiency (Farboud and Meyer 2015), we made six different SLP strains, each differing only in their guide site (Table 1). Five of these were sites previously shown to be highly efficient in other model organisms, while the sixth was designed to maximize the predicted guide efficiency. All had very low predicted off-target effects. We then attempted to integrate into each of these a universal *rpl-28p::mKate2* repair template (pMS81), which also served as a marker of injection success as it

can also be incorporated into and expressed in extrachromosomal arrays. 1.4-9.6% of successfully injected broods (as determined by the presence of at least one mKate2 positive individual at 48 hpi) produced hygromycin resistant individuals. Overall, 79.2% of hygromycin resistant broods (19 of 24) also had perfect integrations events as determined by PCR (Table 1). Imperfect integrations are most often the result of HDR on one side of a double-strand break and incorrect integration on the opposite side, a known issue with transgenic integrations, although rearrangements within the transgene also occur, likely as a byproduct of the array assembly process (Stinchcomb *et al.* 1985).

Overall, we found three guide sites to have similar relatively high efficiencies, while one was slightly less efficient and the other two were much less efficient. The observed efficiencies were not always consistent with the predicted guide site efficiencies. For the top three guide sites 7.9-9.6% of co-marker positive broods contained integrants (not all of which were correct) which equated to approximately 300-450 co-marker positive progeny per integration event. In our hands, injection of thirty total individuals from any of the four best-performing strains was nearly always sufficient to obtain at least one correct line. This is on par with other transgene integration methods directed at this region (Frøkjær-Jensen *et al.* 2008, 2012; Dickinson *et al.* 2013, 2015) which have variable integration efficiencies depending on the transgene, but generally range from 5-30% with a few exceptions reaching higher frequency (Frøkjær-Jensen *et al.* 2012). As previously observed (Paix *et al.* 2014), broods with larger numbers of injection marker positive progeny (jackpots) were the most likely to yield integrants. However, this number was not predictive of perfect versus imperfect integration (Figure S3).

# *In-situ donor assembly and integration*

While plasmids offer the advantage of producing large quantities of the repair template, they require time and labor to produce. Standard cloning practices require a source of DNA, a ligation step, bacterial transformation, plasmid purification, and verification. As we sought to both simplify the process and reduce the overall time-to-integration, we attempted to bypass the cloning step and utilize the *C. elegans* native homology-directed repair to produce a transgene (Figure 2). While clone-free transgenesis has been previously demonstrated in *C. elegans* (Paix *et al.* 2016; Philip *et al.* 2019) we wanted to see if this process could synergize with the split-selection system to further improve the process as the previous work did not provide direct selection on the integration event. To test this approach, we utilized the *sqt-1(e1350)* mutation as it gives a dominant roller phenotype allowing us to assay for *in-situ* assembly. Transgene integration was most efficient for the plasmid vector, with 20% of co-marker positive broods containing an integrant. However, confirmed *in-situ* assembled and integrated *sqt-1* genes were also obtained using both two and six PCR fragments (Table 2, PCR Confirmed Integrations). Two parts correctly assembled and integrated more often than six parts. In some cases, hygromycin resistant individuals were observed without the *sqt-1* roller phenotype (Table 2, Hygromycin Resistant Broods). We believe these represent incorrect integration events, where at least the 5' hygromycin resistance coding fragment was integrated into the genome. As these cannot be correct integration and assembly events, we did not pursue or characterize them.

For two-part assemblies, most hygromycin resistance events were accompanied by *sqt-1* assembly and integration, as indicated by the ability to isolate homozygous roller populations. However, not all of these insertions matched the expected sequence. Two of the eight insertions

could not be amplified by PCR, suggesting larger scale errors, while three had point mutations identified during Sanger sequencing, and three had no detectable errors. In no case did we detect multiple copy insertions. In the six-part experiment, all resistant plates had non-roller (incorrect) integration events, with a few having roller individuals as well (Table 2, Hygromycin Resistant Broods). In most cases, a homozygous roller line could not be isolated, suggesting these individuals were the result of correctly assembled genes in arrays paired with incorrect integrations. In one case, a homozygous roller line could be isolated, indicating multiple integration events had taken place in that brood. In this case, the roller causing integration had a correctly assembled *sqt-1(e1350)* gene but also contained a second copy of one of the homology arms which was identified by Sanger sequencing.

The inclusion of a fluorescent co-marker allowed for monitoring of array loss in this experiment. Since there is no selection on the transgene containing plasmid, any arrays that form should be rapidly lost. As expected, prior to the addition of hygromycin, array positive individuals could be seen. However, none of the homozygous individuals isolated for sequencing (approximately 3-5 generations after injection) contained arrays, demonstrating arrays are indeed quickly lost in this system. Even so, it remains best practice to confirm array loss through either use of an array co-marker or a vector specific PCR performed in conjunction with the genotyping PCR.

## Discussion

We have created a fast and efficient strategy for integrating transgenes into the *C. elegans* genome that bypasses some pitfalls and laborious steps present in other methods. Combining split selection with self-assembly of repair templates takes what before would require at best two

to three weeks down to as little as a week, while simultaneously reducing the required expertise and overall hands-on time (Figure 3). The core technology relies on integration-specific selection, made possible by SLPs at a safe harbor insertion site. These SLPs can be inserted into any *C. elegans* strain using a single set of reagents since the protocol presented does not rely on a particular genetic background. The landing pad presented is universal, and the experimenter can choose any type of cargo to be integrated. However, the SLP design could be modified with additional elements to facilitate specific types of insertions, such as reporter constructs or allelic variants. While we see no obvious phenotypic effects from the constitutive expression of hygromycin resistance protein, the SLP includes LoxP sites, allowing for a second injection of a CRE expression plasmid to remove the hygromycin gene. While removal by CRE injection is relatively efficient (Figure S5), if routine removal of hygromycin is desired, incorporation of inducible CRE and a marker gene into either the landing pad or insertion vector would allow for self-excision using a protocol similar to SEC (Dickinson *et al.* 2015). Further, additional SLPs using either the same or different guide and selective gene could be inserted into other sites in the *C. elegans* genome known to be permissive for transgene expression. This would facilitate the construction of more complex, multigene transgenic nematodes. The antibiotics neomycin (Giordano-Santini *et al.* 2010), puromycin (Semple *et al.* 2010), blasticidin (Kim *et al.* 2014) and nourseothricin (Obinata *et al.* 2018) have all been used for selection in *C. elegans*, and the coding sequences of the corresponding resistance genes could be split. The SLP, conceptually adopted from yeast, does not need to be restricted to *C. elegans*. While the formation of heritable arrays is unique to *Caenorhabditis* nematodes among model systems, and thus does not complicate single-copy integration transgenesis in other models, the concept of custom-designed SLPs could provide direct readouts for integrations events, with specific, custom-built guide

target sequences. For example, a split fluorescent coding sequencing could suffice to screen injected embryos for proper, site-specific integration in model vertebrates and be coupled with a non-native, experimentally chosen guide RNA to reduce off-target effects while increasing on-target cutting and HDR.

The ability of *C. elegans* to self-assemble exogenous DNA fragments based on microhomology represents a possible alternative to plasmid cloning for insert assembly. Individuals with an assembled and integrated transgene were seen using both two or six PCR products. However, six pieces resulted in fewer correct integration and more incorrect integrations (Table 2, Hygromycin Resistant Broods), suggesting that, as expected, proper assembly occurs more often with fewer PCR products. As such, it is likely desirable to complex PCR products by overlap PCR before integration where feasible. While the use of PCR products, rather than plasmids, represents a more rapid protocol with fewer technical steps, it comes with the trade-off of a lower frequency of correct integrations requiring injection and screening of a larger number of worms. Thus, while use of PCR products results in a shorter time to integration confirmation, the total amount of hands on time is similar between the two protocols. Ultimately, at this time, choice of PCR products versus plasmid will largely come down to lab preference, although certain protocols, such as insertion of a library of similar constructs may favor the PCR approach.

Site-specific transgene insertions rely on homology-directed repair (HDR). However, non-homologous end joining is almost always the prevalent pathway in repairing a double-stranded break (Ward 2015; Xu *et al.* 2015). During guide efficiency testing, the top three guides all had



similar insertion frequencies, suggesting we are approaching the upper limit of cutting efficiency and that further improvements will require improved rates of HDR. Furthermore, improved HDR should assist in the assembly of PCR products in worms and reduce the rate of false positives due to incorrect assembly. Low rates of HDR are not specific to *C. elegans* and impair HDR-based insertion in many model systems. As a result, multiple HDR enhancement strategies have been proposed in multiple model organisms (Beumer *et al.* 2008; Böttcher *et al.* 2014; Ward 2015). Adaptation and advancement of one or more of these methods will likely represent the next breakthrough in genome editing efficiency in *C. elegans*.

# **Acknowledgments:**

This project was supported by grants from the National Institutes of Health (R01 AG56436, R35 GM131838) to PCP. We would like to thank Erin Petruccione for technical assistance and Stephen Banse for helpful discussions and comments on the manuscript.

A

### The Synthetic Landing Pad

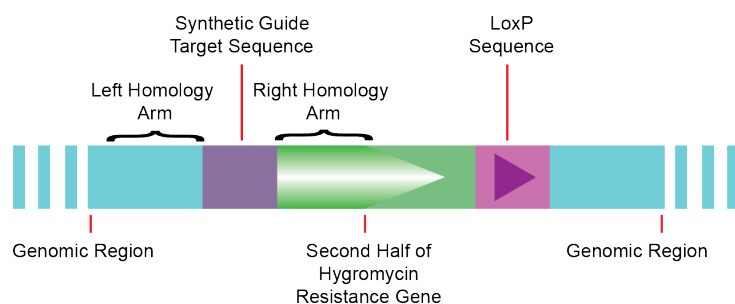

B

### Cargo with Donor Homology

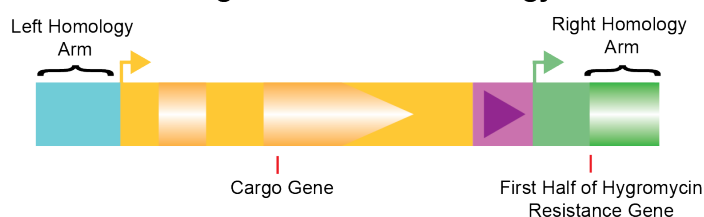

### Molecular Overview of Integration-Specific Selection

C

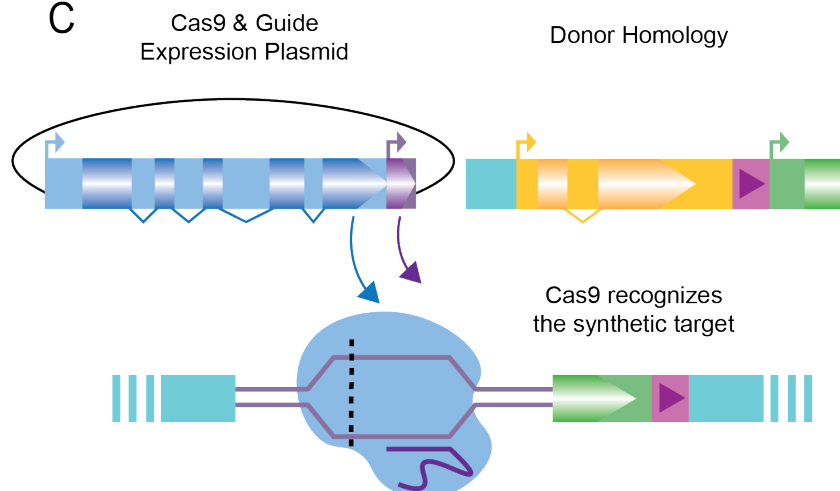

D

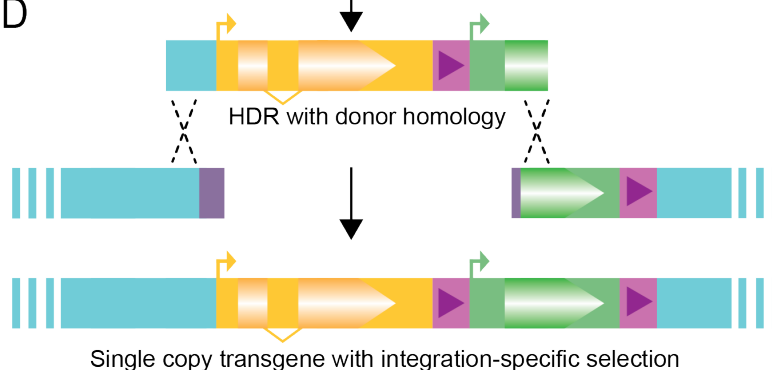

**Figure 1.** Overview of Integration Specific Selection. **A)** The Synthetic Landing Pad (SLP) with synthetic guide RNA target sequence, the 5' fragment of the hygromycin resistance gene (partial coding sequence and UTR), and a single LoxP sequence. **B)** The donor homology with cargo transgene to be inserted, a second LoxP sequence, and the 3' fragment of the hygromycin resistance gene (promoter & partial coding sequence). **C)** Cas9 & guide expression plasmid is injected with donor homology. Cas9 targets and creates a double-strand break at the synthetic target location. **D)** Once the double-strand break is made, repair with the donor homology integrates the transgenic cargo, and restores the hygromycin gene, allowing selection to occur only upon integration.

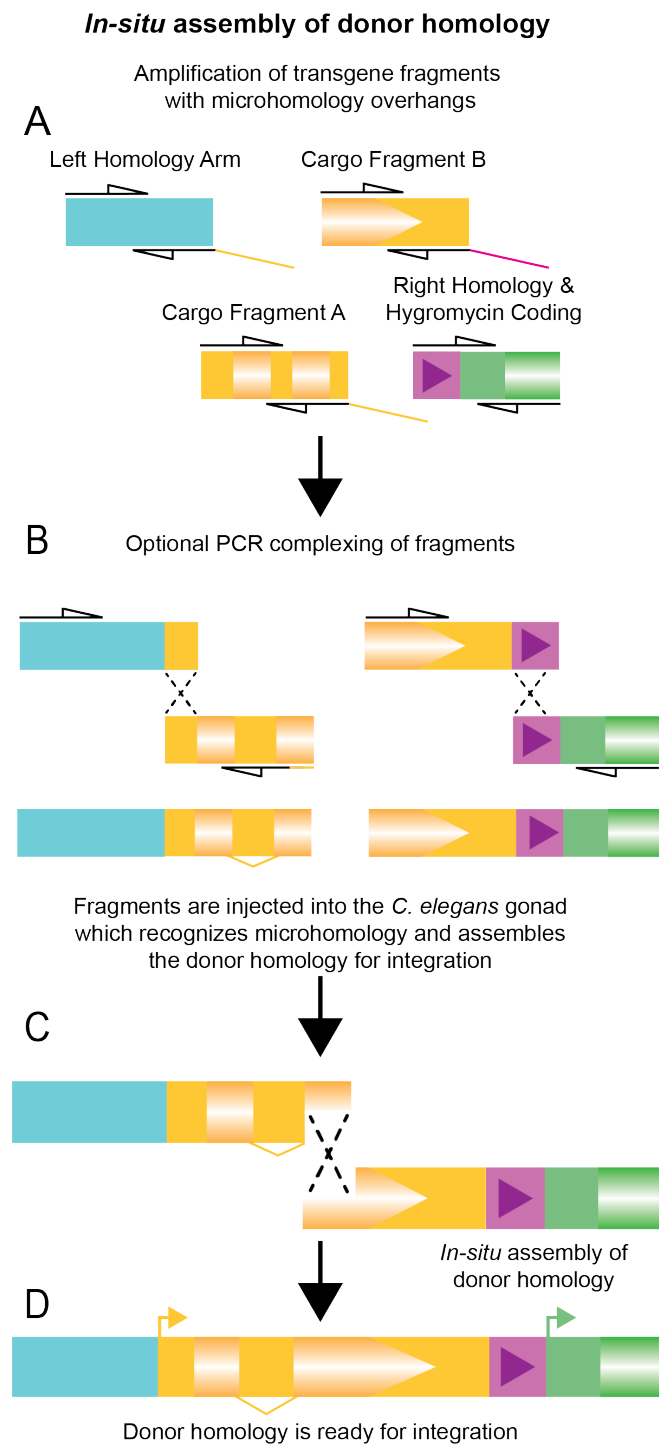

**Figure 2.** Overview of *in-situ* assembly. **A)** Amplification of homology arms and cargo fragments by PCR with overlaps of ~30bp **B)** Optional complexing by a second round of PCR reduces the number of fragments and increases the frequency of correct integration. **C)** Upon microinjection, PCR products are recombined by the worm using microhomology to make **D)** the complete donor homology ready for integration.

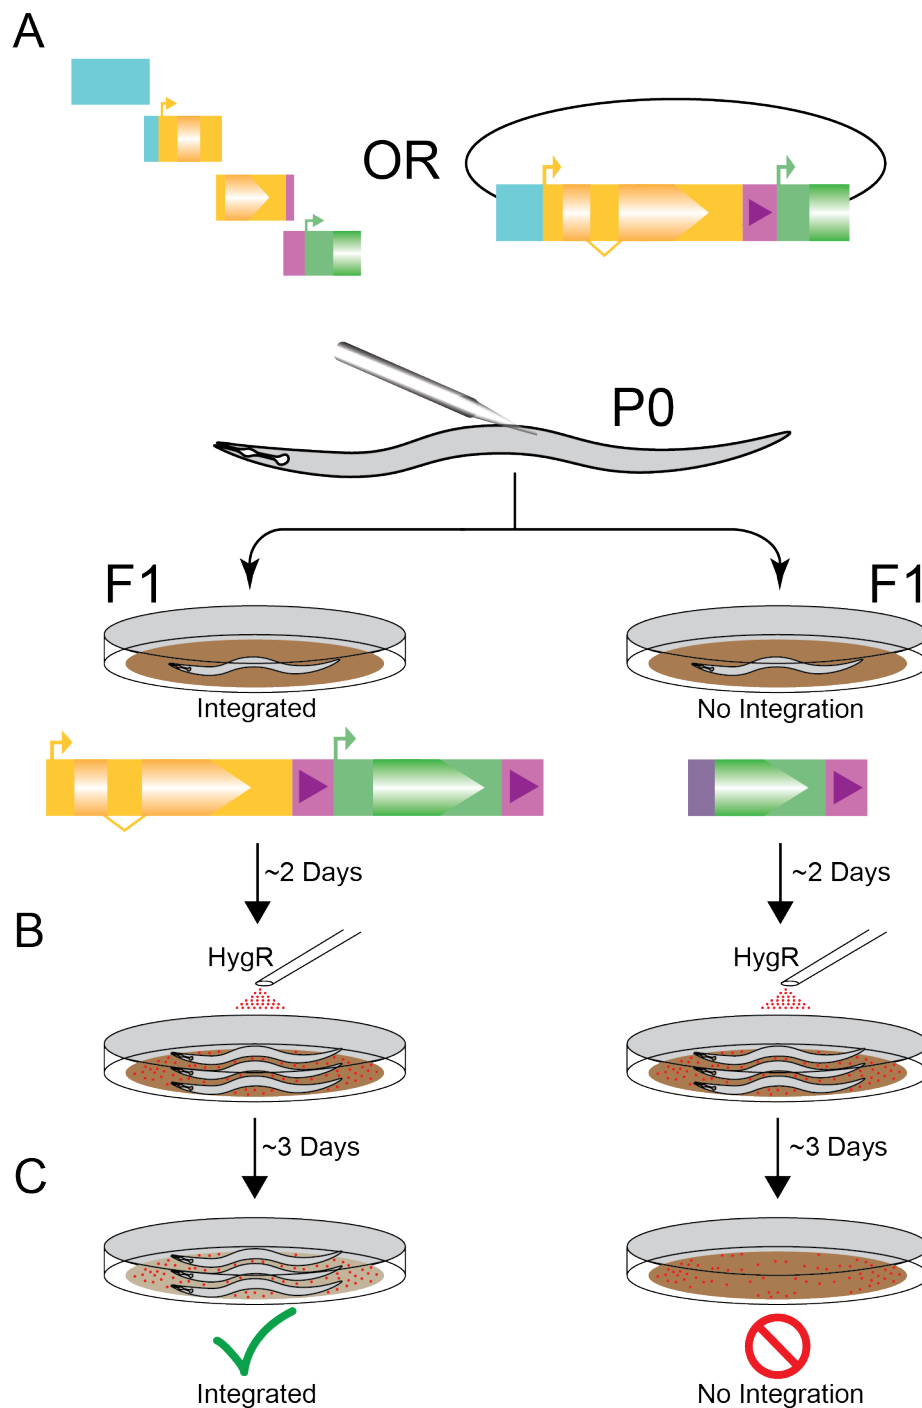

**Figure 3: Experimental Overview.** **A)** Injections of PCR fragment or cloned donor homology with Cas9 and guide expression plasmid. With PCR products, *in-situ* assembly forms the cargo transgene. **B)** Two days after injection, worms are exposed to hygromycin B. Since the array does not provide selection **C)** only integrated worms survive the exposure, providing the integration-specific selection.

**Table 1:** SLP guide efficiency for insertion of *rpl-28p::mKate2*

| Strain | Guide Sequence                  | Reference              | Doench Score <sup>a</sup> | SSC Score <sup>b</sup> | Specificity Score <sup>c</sup> | Marker Positive Broods | HygR Resistant Broods (%) | Correct Integration Broods (%) |
|--------|---------------------------------|------------------------|---------------------------|------------------------|--------------------------------|------------------------|---------------------------|--------------------------------|
| PX692  | GTTTGAGTAGAGCACTCAGG <b>AGG</b> | Kane et al. (2017).    | 66.9                      | 0.7991                 | 99.3                           | 59                     | 5 (8.5%)                  | 3 (5.1%)                       |
| PX693  | GACAGTGGACATCTAAGCGG <b>AGG</b> | Kane et al. (2017).    | 61.5                      | 1.2308                 | 100.0                          | 60                     | 1 (1.7%)                  | 1 (1.7%)                       |
| PX694  | GTCCAGCGGCAGATCGGCGG <b>AGG</b> | Ge et al. (2016)       | 45.1                      | 1.0511                 | 99.7                           | 73                     | 7 (9.6%)                  | 5 (6.8%)                       |
| PX695  | GAGTTCTGTAATTCAGCATA <b>AGG</b> | Agudel et al. (2017).  | 52.8                      | -<br>0.0095            | 99.0                           | 74                     | 1 (1.4%)                  | 1 (1.4%)                       |
| PX696  | GGACAGTCCTGCCGAGGTGG <b>AGG</b> | Varshney et al. (2016) | 40.9                      | 0.5977                 | 99.6                           | 76                     | 6 (7.9%)                  | 5 (6.6%)                       |
| PX697  | GGGGCCTGTGAAATACACAG <b>AGG</b> | N.A.                   | 84.1                      | 0.9981                 | 99.2                           | 77                     | 4 (5.2%)                  | 4 (5.2%)                       |

<sup>a</sup>Predicted guide efficiency as per (Doench *et al.* 2016)

<sup>b</sup>Predicted guide efficiency as per (Xu *et al.* 2015)

<sup>c</sup>Predicted off-target effects as per (Hsu *et al.* 2013)

**Table 2:** In-situ assembly & integration efficiency.

|         |                               | <b>Hygromycin Resistant Broods</b> |              |               | <i><b>In-situ Assembly</b></i>    |                                   |                                |
|---------|-------------------------------|------------------------------------|--------------|---------------|-----------------------------------|-----------------------------------|--------------------------------|
|         | <b>Marker Positive Broods</b> | <b>All Roller</b>                  | <b>Mixed</b> | <b>All wt</b> | <b>Homozygous Roller Isolated</b> | <b>PCR Confirmed Integrations</b> | <b>Error Free Integrations</b> |
| Plasmid | 15                            | 3                                  | 0            | 0             | 3                                 | 3                                 | 3 (20.0%)                      |
| 2pc PCR | 41                            | 6                                  | 3            | 0             | 8                                 | 6                                 | 3 (7.3%)                       |
| 6pc PCR | 51                            | 0                                  | 8            | 5             | 1                                 | 1                                 | 0 (0.0%)                       |







**A.**

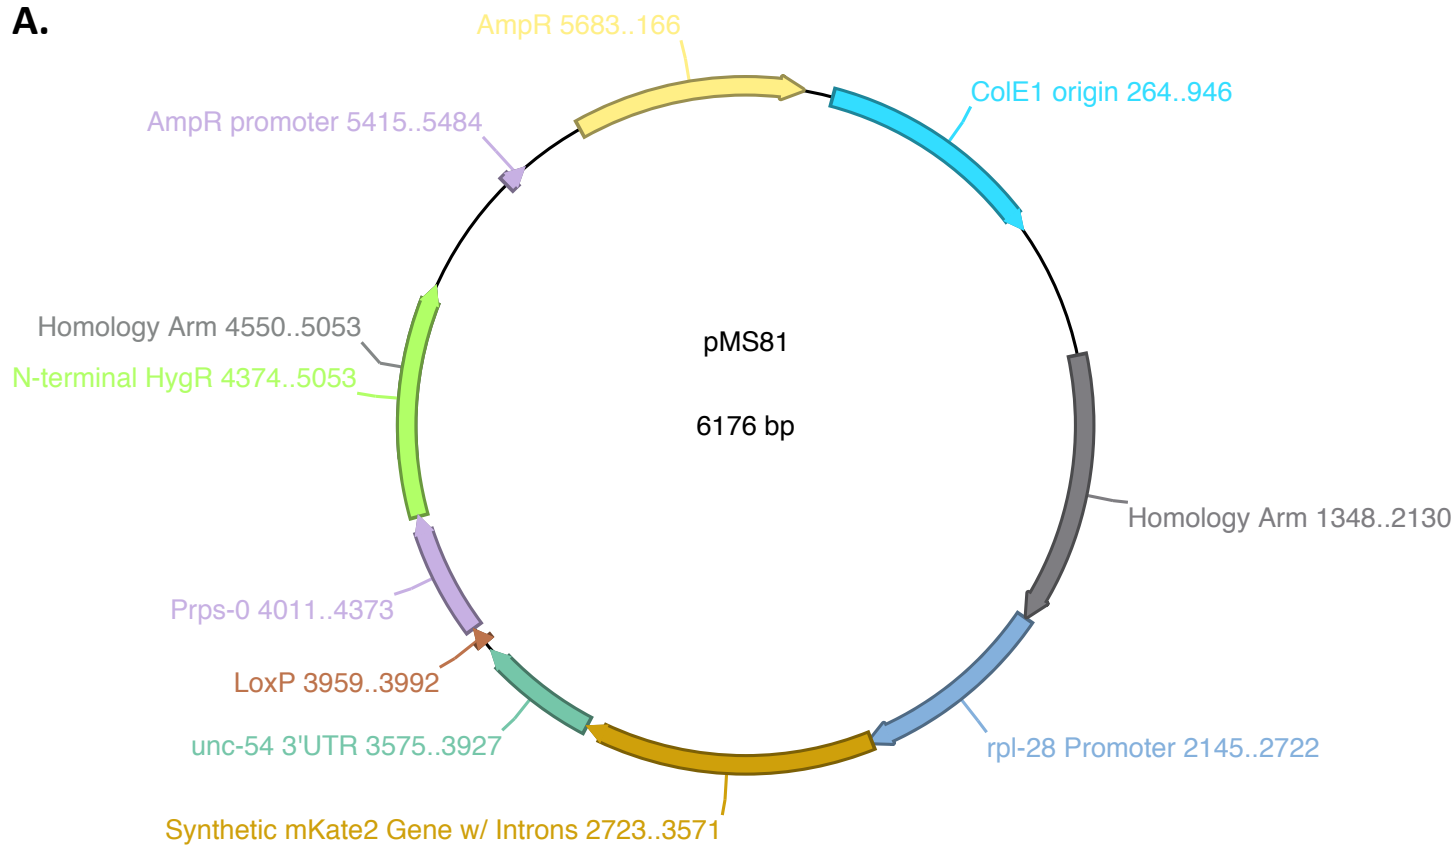

**B.**

```

1 TAAATCTGGAGCCGGTGAAGCGTGGGTCTCGCGGTATCATTGCAGCACTGGGGCCAGATGGTAAGCCCTCCCGTATCGTAGTTATCTACACGACGGGGAGT
101 CAGGCAACTATGGATGAACGAAATAGACAGATCGCTGAGATAGGTGCCTCAGTATTAAGCATTTGGTAAGTCTGACACCAAGTTTACTCATATATACTTT
201 AGATTGATTTAAACATTCATTTTAAATTTAAAGGATCTAGGTGAAGATCCTTTTGGATAATCTCATGACCAAAATCCCTTAAAGTGGATTTTCGTTCCA
301 CTGAGCGTCAGACCCCGTAGAAAAGATCAAAGGATCTTCTTGAGATCCTTTTTCGCGCTAATCTGCTGCTTGCAAAACAAAAACCACCGCTACCA
401 GCGGTGGTTTGGTTTGCCTGATCAAGAGCTACCAACTCTTTTCCGAAGGTAAGTGGCTTCAGCAGAGCGCAGATACCAAAATAGTGTCTCTAGTGTAGC
501 CGTAGTTAGGCCACCACTTCAAGAACTCTGTAGCACCGCCTACATACCTCGCTCTGCTAATCTGTTACCAAGTGGCTGCTGCCAGTGGCGGATAAGTCGTG
601 TCTTACCGGTTGGACTCAAGACGATAGTTACCGGATAAGGCGCAGCGGTGCGGGCTGAACGGGGGGTTCGTGCACACAGCCCAAGCTTGGAGCGGAACGACC
701 TACACGAACTGAGATACCTACAGCGTGAGCTATGAGAAAGCGCCACGCTTCCCGAAGGGAGAAAGGCGGACAGGTATCCGGTAAGCGCGGAGGTTCGGA
801 CAGGAGAGCGCACGAGGGAGCTTCCAGGGGAAACGCTTGGTATCTTTATAGTCTGTCGCGGTTCGCCACCTCTGACTTGAGCGTCGATTTTGTGATG
901 CTCGTCAGGGGGCGGAGCTTATGGAAAAACGCCAGCAACGCGGCCCTTTTACGGTTTCTGGCCTTTTGTGCTCACATGTCTTCTTCCTGCG
1001 TTATCCCTGATTTCTGTGATAACCGTATACCGCCTTTGAGTGAGCTGATACCGCTCGCCGAGCCGACGACCGAGCGCAGCGAGTCACTGAGCGAGG
1101 AAGCGGAAGAGCGCCAATACGCAAAACCGCCTCTCCCGCGCGCTTGGCGGATTCAATTAATGCACTGGCACGACAGGTTCCCGAATGGAAAGCGGGCAG
1201 TGAGCGCAACGCAATTAATGTGAGTTAGCTACTCATTAGGCACCCAGGCTTTACACTTTATGCTTCCGGCTCGTATGTTGTGGAATTTGAGCGGA
1301 TAACAATTTACACAGGAAACAGCTATGACCATGATTACGCCAAGCTTactCGTTTAGGCTATTTCCCTATTTTGTATATTCCTTCGCACATatgaaad
1401 tactttttttcgaaactgtTAACCTCAGAATTTATAAATCTATAGCCTTACTTGATTTATTTATATCATGTTACTCACCTCATgtctctttctctttt
1501 caagAAGTCTTCGTTATATCTGTCTCTTTCCCTCTTTTGAATCTCTGCTTTGCTCTTCGCCAtgtttctgaaataatgtAACTTGAATTTGTGt
1601 aatataacttttttaatttgaatttggcTTGTAAACGGGAATCACTACGTGCGGGATCATTTCTTACTAGAAAACCCAGAAAATGCCATATTTCACTTATC
1701 TCGGGGTcattttctaattagaaaagctacaaaaccatttctaattACGGTGACTTTAGAAGTGGTCGAAATAGCTAATTAGAAATGGGTTTTTGTCTAAT
1801 TAGAGGTGACTCTATGTTATCTGAGTAAGCCTCGTTTGTATGTAAACTCACAGTACTAATAAATGCAAGACACCCGGGTTTGTCTAGatgatgaaataatt
1901 gaaataatcaATTCTGACAGACAATAATGGTAATCTTGATAAGGAGTTCCACGCCAGGAGAACACGttagttttctgtttttgattGCGTGcgttattt
2001 tggagaaaaactcgattttttacaaaataattttttgaaaggaaactgttcaataagttttgtcttttttctcaGTTGTGATAcggttttttattctttt
2101 tttgtaGTTATACAGAGACCGCctgcaggATTGAGTGAGCACTTGAAGGGAGAAAATGCGGAGAGAGAAGAACCCAGCATCTTAATAAAATATATAAT
2201 TTTGAATAAAATCAAATTAATAAAGATTAAATTGAAACACAACAATAGAAGTACGAAAAATTACTATAAGAAATAATTTATTTTGAAGAAGTTGTGTG
2301 GATTTTACGATAAAAACTACACGAAACGAGGCTCCGCGTTTACACCGTTTGGCAATGGAGCGCGCTTGCTATTAGATTTTAGGCCAGTCAACGAAAGTT
2401 TAAATTTATTTTCTCTTTTTCATTTTTCAGTAAATATCGAATTTTGTATTAATTTCTGTAAATTTTATAAATTTGCAACTATTTTGGCGTATTT
2501 CTGCTTGTTTTATCAGCGAATTTTATGCATTTTCACTCAAAAGTTTGAGCAGGAAAAATGACATTTAGGACTTTGTAAAATTTGTATTTCTAAATTTGCT
2601 TGAACCACTACGTGTACAATTTGATTTTATTTGAAATTTTCTTACGTTTCCCGTTGTATCTTATTTGATTTTAACTTTTCATCATAAAAATTTATTTCCAGG
2701 TAAATATCCGACGCTCTCGTATGGTCTCCGAGCTCATTAAGAAAAATATGATATGAAGTCTACATGGAGGGAAACCGTCAACACCACTTCAAG
2801 TGCACCTCCGAGGGAGAGGGAAGCCATACGAGGGAACCAACCATGCGTATCAAGGCGCTCGAGGGAGGACCACTCCCATTCGCTTCGACATCTCG
2901 CCACCTCCTTCATGTACGGATCCAAGGtaagtttaaacatatataactaactaacctgattatttaattttcagACCTTCATCAACACACCAAGG
3001 AATCCAGACTTCTTCAAGCAATCTTCCAGAGGATTCACCTGGGAGCGGTGTCACCACTACGAGGACGGAGGAGTCTCACCGCCACCAAGACACC
3101 TCCCTCCAAGACGGATGCGCTCATCTACAACGTCAAGGtaagtttaaacagtttcggtactaactaaccatataatttaattttcagATCCGTGGAGTCA
3201 ACTTCCCATCAACGAGACAGTCAAGAAAGAACCCCTCGGATGGGAGGCTCCACCGAGACCCCTTACCAGCGCAGGAGGACTTGGAGGAGCTGCG
3301 CGACATGGCCCTCAAGCTCGTGGAGGAGGACACCTCATCTGCAACCTCAAGGtaagtttaaacatgattttactaactaactaatctgattttaaattt

```

```

3401 cagACCACCTACCGTTCCAAGAAGCCAGCCAAAGAACTCAAGATGCCAGGAGTCTACTACGTCGACCGTCGTCTTGAGCGTATCAAGGAGGCCGACAAGG
3501 AGACCTACGTCGAGCAACACGAGGTCCGCGTCGCCCGTTACTGCGACCTCCCATCCAAGCTCGGACACCGTTAAGTCCAATTACTCTTCAACATCCCTAC
3601 ATGCTCTTTCTCCCTGTGCTCCACCCCTATTTTGTATTATCAAAAACTCTCTTAATTCTTTGTTTTGTAGCTCTTTTAAAGTCACCTCTAAACA
3701 ATGAAATTGTGTAGATTCAAAAATAGAAATAATTTCGTAATAAAAAAGTCGAAAAAAATTTGTCTCCCTCCCCCATTAATAATAATTCTATCCCAAAATCT
3801 ACACAATGTTCTGTGTACACTTCTTATGTTTTTACTTCTGATAAAATTTTGTGAACATCATAGAAAAAACCGCACAAAAATACCTTATCATATGTTA
3901 CGTTTCAGTTTATGACCGCAATTTTACTTAAGTTCAATCCGGAAGGtaagtttaaaATAACTTCGTATAGCATACATTATACGAAGTTATtttcagGG
4001 AGAGCAAAAGATTTTTCGTTTCGTCGTAATCTACACACGCGTCTCTCCGTGCGAGAGTCCAAGCCAGCAGCCAAATTCGTTGACTGAGTATTCACAGT
4101 TTATACGTTGTGCGCAACGAGAAATAGGAAATGCATCGGGAATGTTCTTTTTCGATTTTTCGAAGTTTGTACAAATTTACACGAATTTTGCTA
4201 TGTTTTCAATTAATAAATATGTTATTCAACTGTTTCTATGAGGAAAATAAGGCTTTGCATGTAATTTTCTTATTCAGCATAATTTTAAATTAATTGAAT
4301 TTTCTGTCTAACGTTTATTTTGTCTTGGTTATGACTGATCTGAAATTAATTTTGAATTTAAGGTAATatgaaaaacccgagttgaccgccaca
4401 tccgtagagaagttcctcatcgagaagttcgactccgtctccgacctcatgcaactctccgagggagaggagttcccgctgcttctccttcgacgtcggag
4501 gacgtggatacgtcctccgtgtcaactcctgcgcgacggattctacaaggaccgttacgtctaccgtcacttcgctccgcccctcccaatcccaga
4601 ggtcctcgacatcggagagttctccgagtcctcactactgcactcctccgtcgtgcccagaggtcaccctccagacctcccagagaccgagctccca
4701 gccgtcctccaaaccagtcgcccagggccatggacgccatgcgccgcccgcacgtctcccaaacctccgattcggaccattcggaccacaaggaatcggac
4801 aatacaccacctggcgtagcttcatctgcgccatcgccgaccacacgtctaccactggcaaacctgcatggacgacacgtctcctccgtcgcgccca
4901 agccctcgacgagctcatgctctgggcccaggactgccagaggtccgtcacctcgtccacgcccgacttcggatccaacaacgtcctcaccgacaacgga
5001 cgtatcacccgcccgtcatcgactgggtccgagggccatgttcggagactcccaataTGCGGTATTTTCTCCTTACGCATCTGTGCGGTATTTACACCCGATA
5101 TGGTGCACTCTCAGTACAATCTGCTCTGATGCCGCATAGTTAAGCCAGCCCCGACACCCGCCAACACCCGCTGACGCGCCTGACGGGCTTGCTGCTCC
5201 CGGCATCCGCTTACAGACAAGCTGTGACCGTCTCCGGGAGCTGCATGTGTGAGAGGTTTTCACCGTCATCACCAGAACCGCGCAGACGAAAGGGCCTCGT
5301 GATACGCCTATTTTATAGGTTAATGTCATGATAATAATGTTTCTTAGACGTCAGGTGGCACTTTTCGGGGAAATGTGCGCGGAACCCCTATTTGTTTA
5401 TTTTCTAAATACATTCAAAATATGTATCCGCTCATGAGACAATAACCCCTGATAAATGCTTCAATAATATTGAAAAAGGAAGAGTATGAGTATTCAACATT
5501 TCCGTGTCGCCCTTATTTCCCTTTTTCGCGCATTTTGCCCTTCTGTTTTTGCTCACCCAGAAACGCTGGTGAAAGTAAAGATGCTGAAGATCAGTTGGG
5601 TGCACGAGTGGGTACATCGAACTGGATCTCAACAGCGGTAAAGATCCTTGAGAGTTTTCGCCCCGAGAAGCTTTTCCAATGATGAGCACTTTTAAAGTT
5701 CTGCTATGTGGCGCGGTATTTATCCCGTATTGACGCCGGGCAAGAGCAACTCGGTGCGCCGATACACTATCTCAGAAATGACTTGGTTGAGTACTCACCAG
5801 TCACAGAAAAGCATCTTACGGATGGCATGACAGTAAGAGAATTATGCAGTGCTGCCATAACCATGAGTGATAACACTGCGGCCAACTTACTTCTGACAAC
5901 GATCGGAGGACCGAAGGAGCTAACCGCTTTTTCGACAACATGGGGATCATGTAACCTCGCTTGATCGTTGGGAACCGGAGCTGAATGAAGCCATACCA
6001 AACGACGAGCGTGACACCAGATGCCTGTAGCAATGGCAACACGTTGCGCAAACTATTAACCTGGCGAACTACTTACTCTAGCTTCCCGGCAACAATTA
6101 TAGACTGGATGGAGGGCGGATAAAGTTGCAGGACCACTTCTGCGCTCGGCCCTTCGCGCTGGCTGGTTTATTGCTGA

```

**Figure S2.** (A) Schematic of cargo insertion vector pMS81 and (B) corresponding color-coded sequence

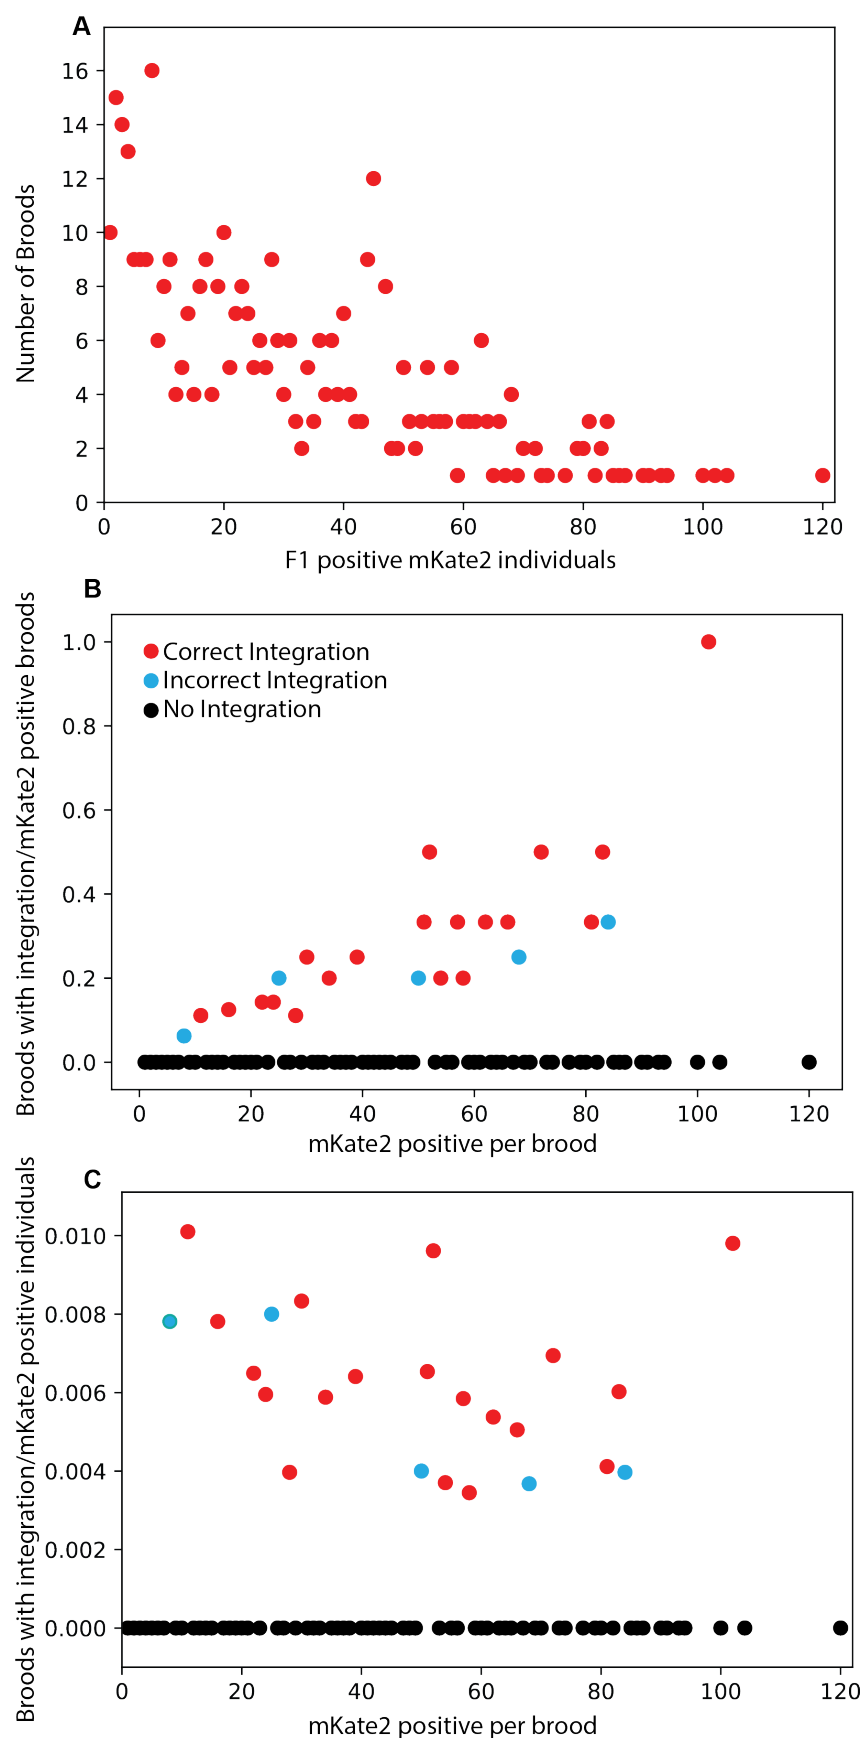

**Figure S3.** Comparison of integration broods. **A)** Distribution of injection marker (*mKate2*) positive broods based on the number of *mKate2* positive F1 individuals per brood. Broods with a small number of positive individuals are most common; however, there are ‘jackpot’ injections showing large numbers of individuals. **B)** Broods with a large number of *mKate2* positive F1 individuals are more likely to have integration events, both correct and incorrect. However, when controlling for the total number of *mKate2* positive individuals, **C)** each brood with positive F1s is nearly equally likely to have integration events. Thus, while jackpot broods may have more transgenics, having more transgenics spread across several plates is similarly sufficient for identifying successful integration events.

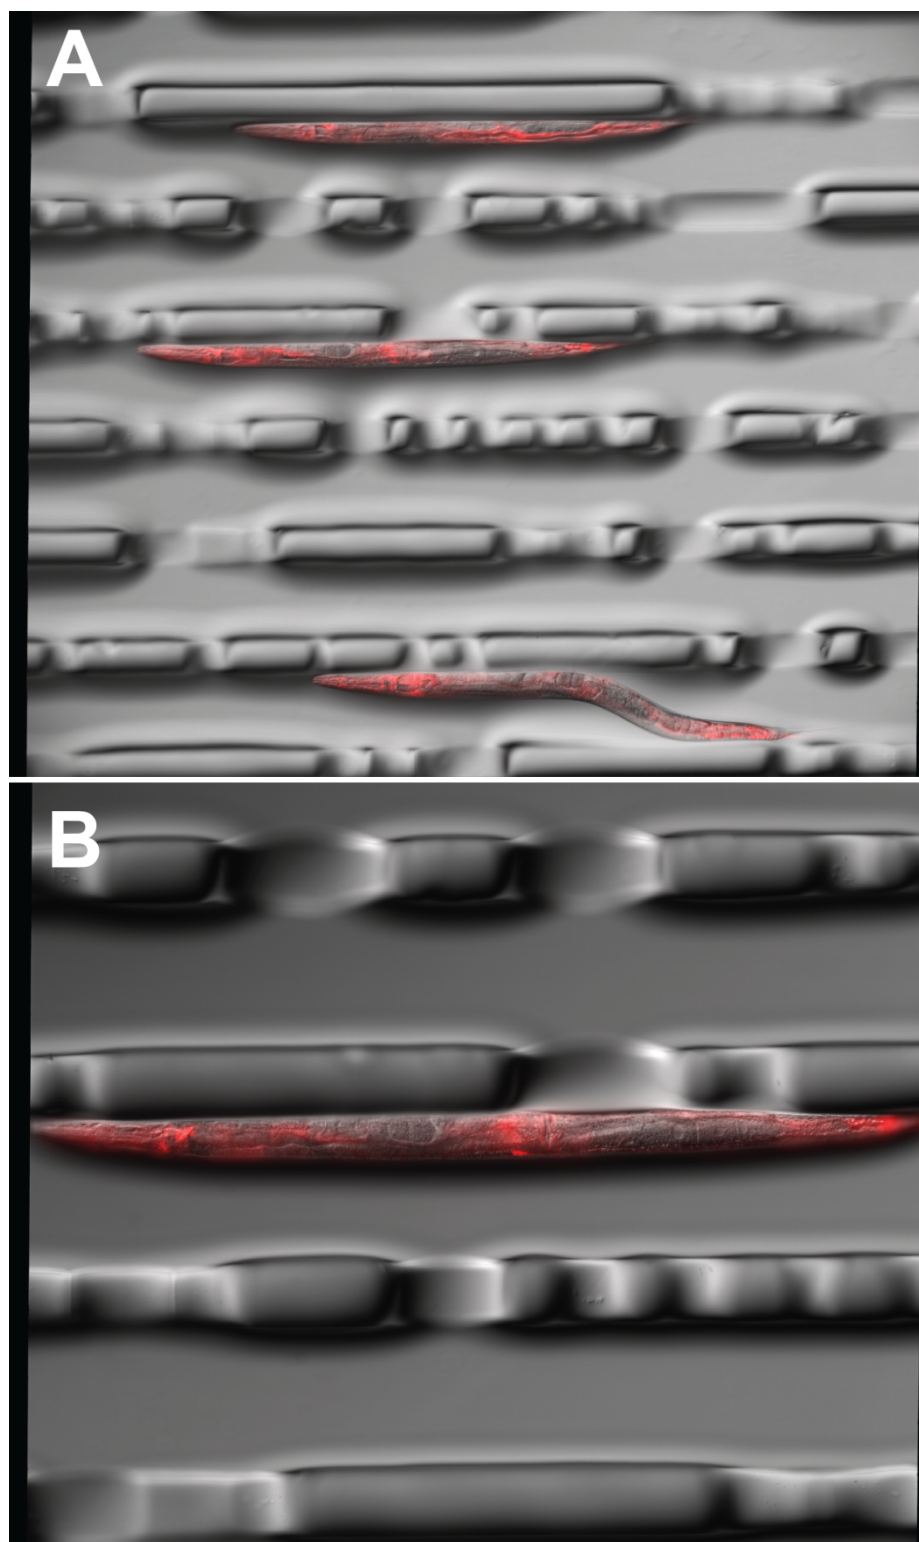

**Figure S4.** Representative images of *eft-3p::wrmScarlet::tbb-2 3'UTR* (pZCS16) array individuals. Synchronized young adults were injected with a mix containing 3 ng/ $\mu$ l pZCS16 91.25 ng/ $\mu$ l total DNA. A) Composite image of 30ms DIC and 40ms mCherry filter at 100x total magnification. B) Composite image 60ms DIC and mCherry filter at 200X total magnification.

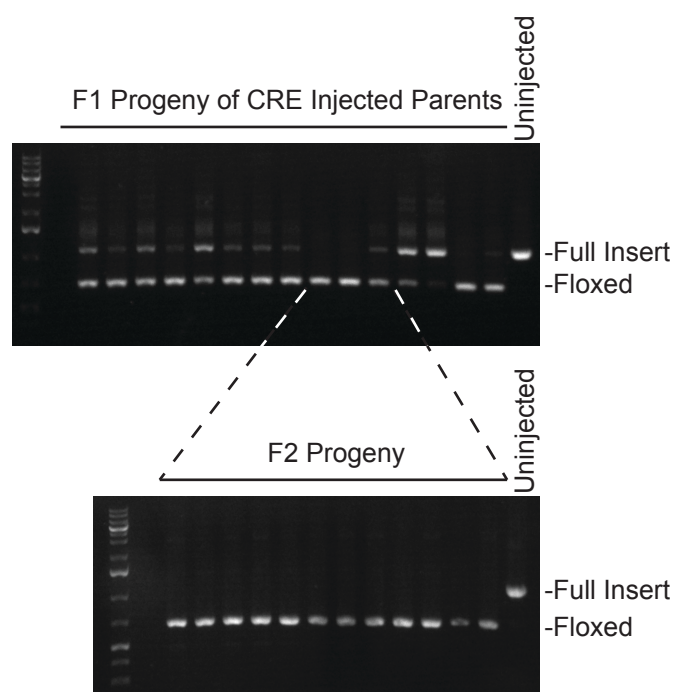

**Figure S5.** Injection of a CRE expressing plasmid results in the efficient removal of the hygromycin resistance marker gene. Co-marker expression marker positive F1 progeny (upper panel) were PCR screened for removal of the hygromycin resistance gene (“floxed” product). Four F2 progeny (lower panel) from three of the F1 broods with the weakest wild-type signal (“full insert” product), were then screened to confirm homozygous removal.

**Table S1.** Strains generated for this study

| Strain | Background | Genotype                                                                          |
|--------|------------|-----------------------------------------------------------------------------------|
| PX692  | N2         | <i>fxIs6</i> [ <i>synthetic guide1::ΔHYGR::unc-54 3' UTR::LoxP</i> , II:8420157]  |
| PX693  | N2         | <i>fxIs7</i> [ <i>synthetic guide2::ΔHYGR::unc-54 3' UTR::LoxP</i> , II:8420157]  |
| PX694  | N2         | <i>fxIs8</i> [ <i>synthetic guide3::ΔHYGR::unc-54 3' UTR::LoxP</i> , II:8420157]  |
| PX695  | N2         | <i>fxIs9</i> [ <i>synthetic guide4::ΔHYGR::unc-54 3' UTR::LoxP</i> , II:8420157]  |
| PX696  | N2         | <i>fxIs10</i> [ <i>synthetic guide5::ΔHYGR::unc-54 3' UTR::LoxP</i> , II:8420157] |
| PX697  | N2         | <i>fxIs11</i> [ <i>synthetic guide6::ΔHYGR::unc-54 3' UTR::LoxP</i> , II:8420157] |



**Table S2.** Plasmids generated for this study

| Plasmid | Information                                                                                     |
|---------|-------------------------------------------------------------------------------------------------|
| pMS8    | All-in-one plasmid targeting guide site at Chromosome II:8420188-8420210 (equivalent to pDD122) |
| pMS59   | All-in-one plasmid targeting guide site in PX692                                                |
| pMS76   | All-in-one plasmid targeting guide site in PX693                                                |
| pMS77   | All-in-one plasmid targeting guide site in PX694                                                |
| pMS78   | All-in-one plasmid targeting guide site in PX695                                                |
| pMS79   | All-in-one plasmid targeting guide site in PX696                                                |
| pMS80   | All-in-one plasmid targeting guide site in PX697                                                |
| pMS2    | Multiple cloning site flanked by homology arms                                                  |
| pMS4    | SEC flanked by homology arms                                                                    |
| pMS70   | Repair template for insertion of landing pad into PX692 (includes SEC)                          |
| pMS71   | Repair template for insertion of landing pad into PX693 (includes SEC)                          |
| pMS72   | Repair template for insertion of landing pad into PX694 (includes SEC)                          |
| pMS73   | Repair template for insertion of landing pad into PX695 (includes SEC)                          |
| pMS74   | Repair template for insertion of landing pad into PX696 (includes SEC)                          |
| pMS75   | Repair template for insertion of landing pad into PX697 (includes SEC)                          |
| pMS12   | <i>rpl-28p::mKate2::unc-54</i> 3'UTR reporter flanked by homology arms                          |
| pMS81   | <i>rpl-28p::mKate2::unc-54</i> 3'UTR reporter in split HygR insertion vector                    |
| pZCS52  | <i>sqt-1(e1350)</i> in split HygR insertion vector                                              |
| pZCS16  | <i>eft-3p::wrmScarlet::tbb-2</i> 3'UTR reporter                                                 |
| pZCS23  | <i>eft-3p::NLS::CRE::tbb-2</i> 3' UTR (CRE expression plasmid)                                  |

**Table S3.** Primers used in this study

| Name  | Sequence (5'→3')                                                         | Purpose                                                                                                                   |
|-------|--------------------------------------------------------------------------|---------------------------------------------------------------------------------------------------------------------------|
| MS276 | TTTGAGTAGAGCACTCAGGGTTTATAGAGCT<br>AGAAATAGCAAGT                         | Mutagenic primer for generation of pMS59                                                                                  |
| MS344 | ACAGTGGACATCTAAGCGGGTTTATAGAGCT<br>AGAAATAGCAAGTAAAAATAAGGC              | Mutagenic primer for generation of pMS76                                                                                  |
| MS362 | TCCAGCGGCAGATCGGGGGTTTATAGAGCT<br>AGAAATAGCAAGT                          | Mutagenic primer for generation of pMS77                                                                                  |
| MS348 | AGTTCTGTAATTCAGCATAGTTTATAGAGCT<br>AGAAATAGCAAGTAAAAATAAGGC              | Mutagenic primer for generation of pMS78                                                                                  |
| MS363 | GACAGTCCTGCCGAGGTGGGTTTATAGAGCT<br>AGAAATAGCAAGT                         | Mutagenic primer for generation of pMS79                                                                                  |
| MS352 | GGGCCTGTGAAATACACAGTTTATAGAGCT<br>AGAAATAGCAAGTAAAAATAAGGC               | Mutagenic primer for generation of pMS80                                                                                  |
| MS18  | GCCTGCAGGAGCTCTTAAGACGAAGTGAGT<br>TTGCTACCATC                            | Forward mutagenic primer for generation of pMS2                                                                           |
| MS17  | GTCTTAAGAGCTCCTGCAGGCGGTCTTCTG<br>TATAACTACAA                            | Reverse mutagenic primer for generation of pMS2                                                                           |
| MS49  | ACCGCTGCAGGAGCTGTAAGTTTAAAAATA<br>ACTTCGTATAGCATAC                       | Forward primer for amplification of SEC for insertion into pMS2                                                           |
| MS50  | CACTTCGTCTTAAGAGCTCAGATCCGGCTC<br>CCTGAAA                                | Reverse primer for amplification of SEC for insertion into pMS2                                                           |
| MS338 | TATACAGAAGACCGCCTGCAGGGTTGAGT<br>AGAGCACTCAGGAGGGACCGTTACGTCTAC<br>CGT   | Forward primer for amplification of C-terminal HYGR for insertion into pMS4 (with guide for PX692)                        |
| MS339 | TATACAGAAGACCGCCTGCAGGGACAGTG<br>GACATCTAAGCGGAGGGACCGTTACGTCTA<br>CCGT  | Forward primer for amplification of C-terminal HYGR for insertion into pMS4 (with guide for PX693)                        |
| MS340 | TATACAGAAGACCGCCTGCAGGGTCCAGCG<br>GCAGATCGGCGGAGGGACCGTTACGTCTAC<br>CGT  | Forward primer for amplification of C-terminal HYGR for insertion into pMS4 (with guide for PX694)                        |
| MS341 | TATACAGAAGACCGCCTGCAGGGAGTTCTG<br>TAATTCAGCATAAAGGGACCGTTACGTCTAC<br>CGT | Forward primer for amplification of C-terminal HYGR for insertion into pMS4 (with guide for PX695)                        |
| MS342 | TATACAGAAGACCGCCTGCAGGGGACAGTC<br>CTGCCGAGGTGGAGGGACCGTTACGTCTAC<br>CGT  | Forward primer for amplification of C-terminal HYGR for insertion into pMS4 (with guide for PX696)                        |
| MS343 | TATACAGAAGACCGCCTGCAGGGGGGCTG<br>TGAAATACACAGAGGGACCGTTACGTCTAC<br>CGT   | Forward primer for amplification of C-terminal HYGR for insertion into pMS4 (with guide for PX697)                        |
| MS249 | CTTGGCACGTGGACGGGT                                                       | Reverse primer for amplification of C-terminal HYG for insertion into pMS4 and for <i>sqt-1</i> integration amplification |
| MS246 | CGTCGTCCATCCACCCGTCCACGTGCCAAG<br>GAGTAAGTCCAATTACTCTTCAACATCC           | Forward primer for amplification of <i>unc-54 3'UTR</i> for insertion into pMS4                                           |
| MS261 | CGAAGTTATTTAACTTACAGCTCCTGCA<br>CTAGTAAAAATTGCGGTCATAAACTG               | Reverse primer for amplification of <i>unc-54 3'UTR</i> for insertion into pMS4                                           |
| MS79  | CACTTCGTCTTAAGAGCTCTCGAGGGGAGA<br>AAATGCG                                | Forward primer for amplification of <i>rpl-28p</i> for insertion into pMS2                                                |
| MS78  | TTAATGAGCTCGGAGACCATCACGAGAGCG<br>TCGGATATT                              | Reverse primer for amplification of <i>rpl-28p</i> for insertion into pMS2                                                |
| MS70  | ATGGTCTCCGAGCTCATTA                                                      | Forward primer for amplification of mKate2 for insertion into pMS2                                                        |
| MS71  | ACGGTGTCCGAGCTTGGAT                                                      | Reverse primer for amplification of mKate2 for insertion into pMS2                                                        |
| MS73  | ATCCAAGCTCGGACACCGTTAAGTCCAATT<br>ACTCTTCAACATCC                         | Forward primer for amplification of <i>unc-54 3'UTR</i> for insertion into pMS2                                           |
| MS72  | ACCGCTGCAGGAGCTTAAAAATTGCGGTC<br>ATAAACTGAA                              | Reverse primer for amplification of <i>unc-54 3'UTR</i> for insertion into pMS2                                           |
| MS356 | CCTGCAGGATTGAGTAGAGCACTCGAGGG<br>GAGAAAAATGC                             | Forward primer for amplification of <i>rpl-28p::mKate2::unc-54 3'UTR</i> for insertion into intermediate                  |
| MS357 | GGATTGAACCTAAGTAAAAATTGCGGTCAT<br>AAACTGA                                | Reverse primer for amplification of <i>rpl-28p::mKate2::unc-54 3'UTR</i> for insertion into intermediate                  |
| MS268 | CAGGGAGAGCAAAAGATTTTGTCTTCGTC<br>GTAA                                    | Forward primer for amplification of <i>rps-0p</i> and N-terminal HYGR                                                     |

|        |                                                                         |                                                                                                                                                                              |
|--------|-------------------------------------------------------------------------|------------------------------------------------------------------------------------------------------------------------------------------------------------------------------|
| MS359  | GTAGACGTAACGGTCCTTGTAGAATCCGTC<br>GGCG                                  | Reverse primer for amplification of <i>rps-0p</i> and N-terminal HYGR                                                                                                        |
| MS354  | GACGGATTCTACAAGGACCGTTACGTCTAC<br>CGTCA                                 | Forward primer for amplification of internal HYGR                                                                                                                            |
| MS271  | GGAGAAAATACCGCATATTGGGAGTCTCCG<br>AACA                                  | Reverse primer for amplification of internal HYGR                                                                                                                            |
| MS272  | CGGAGACTCCCAATATGCGGTATTTCTCCT<br>TACG                                  | Forward primer for amplification of pUC57 backbone                                                                                                                           |
| MS273  | TAGCCTAAACGAGTGAGCTTGGCGTAATCA<br>TGGTC                                 | Reverse primer for amplification of pUC57 backbone                                                                                                                           |
| MS262  | TGATTACGCCAAGCTCACTCGTTTAGGCTA<br>TTCC                                  | Forward primer for truncated genomic homology arm                                                                                                                            |
| MS355  | CCTCGAGTGCTCTACTCAAATCCTGCAGG                                           | Reverse primer for truncated genomic homology arm                                                                                                                            |
| ZCS282 | CTTCGTATAGCATACATTATACGAAGTTAT<br>ATTTTGTCTTTCGTCGTAAATCTACACACG        | Forward primer for amplification of empty split HygR insertion vector/<br>3' homology arm                                                                                    |
| ZCS168 | TGAGAATGGAAGATAGACAATCGAGGGCA<br>GCCTGCAGGCGGTCTTCTG                    | Reverse primer for amplification of empty split HygR insertion vector/5'<br>homology arm                                                                                     |
| ZCS71  | CTGCCCTCGATTGTCTATCTTCC                                                 | Forward primer for amplification of <i>sqt-1(e1350)</i> for insertion into split<br>HygR insertion vector/ <i>sqt-1</i> fragment (2 and 6pc)                                 |
| MS460  | CTTCGTATAATGTATGCTATACGAAGTTATC<br>TGAATCTCAAATATTTATTAGAAAACACC<br>AAC | Reverse primer for amplification of <i>sqt-1(e1350)</i> for insertion into split<br>HygR insertion vector/ fragment (2 and 6pc)                                              |
| ZCS237 | CGGGTACCGAGCTCGAATTC                                                    | Forward primer for amplification of pUC19 backbone                                                                                                                           |
| ZCS238 | GGGATCCTCTAGAGTCGAC                                                     | Reverse primer for amplification of pUC19 backbone                                                                                                                           |
| ZCS249 | GGTCGACTCTAGAGGATCCCGCACCTTTGG<br>TCTTTTATTGTC                          | Forward primer for amplification of <i>eft-3p</i>                                                                                                                            |
| ZCS270 | TTTTTCTAGAGCAAAGTGTTTC                                                  | Reverse primer for amplification of <i>eft-3p</i>                                                                                                                            |
| ZCS271 | AACACTTGTCTAGAAAAAATGGTCAGCA<br>AGGGAGAG                                | Forward primer for amplification of wrmScarlet                                                                                                                               |
| ZCS272 | TTGCATTATCACTAGTTACTTGATAGAGCT<br>CGTCCATTC                             | Reverse primer for amplification of wrmScarlet                                                                                                                               |
| ZCS269 | TAAACTAGTGATAAATGCAAAATC                                                | Forward primer for amplification of <i>tbb-2 3'UTR</i>                                                                                                                       |
| ZCS246 | GAATTCGAGCTCGGTACCCGTGAGACTTTT<br>TTCTTGGC                              | Reverse primer for amplification of <i>tbb-2 3'UTR</i>                                                                                                                       |
| ZCS242 | GACGGGACATTTTTTCTAGAGCAAAGTGTT<br>TC                                    | Reverse primer for amplification of <i>eft-3p</i> with NLS overlaps                                                                                                          |
| ZCS243 | TCTAGAAAAAATGTCCCGTCGTCGTAAG                                            | Forward primer for amplification of <i>NLS::CRE</i>                                                                                                                          |
| ZCS244 | TATCACTAGTTTAGTCTCCGTCCTCAAG                                            | Reverse primer for amplification of <i>NLS::CRE</i>                                                                                                                          |
| ZCS245 | CGGAGACTAACTAGTGATAAATGCAAAAT<br>CC                                     | Forward primer for amplification of <i>tbb-2 3'UTR</i> with CRE overlaps                                                                                                     |
| MS59   | GCTTATCTCGAATGAGACCCTTG                                                 | Forward primer for PCR confirmation of landing pad insertion and Cre<br>removal of HygR/sequencing and <i>sqt-1</i> integration amplification                                |
| MS93   | GGAGGCGAACCTAACTGTAAG                                                   | Reverse primer for PCR confirmation of landing pad insertion                                                                                                                 |
| MS58   | GCCCAGGAGAACACGTTAG                                                     | Sequencing primer for landing pad insertion and <i>sqt-1</i> integration<br>amplification & Sanger sequencing                                                                |
| MS291  | AGTGCATTTGAAAGGATAACGG                                                  | Forward primer for PCR confirmation of <i>rpl-28p::mKate2</i> insertion and<br>for <i>sqt-1</i> integration amplification and Sanger sequencing                              |
| MS119  | CCTCGTATGGCTTTTCCTCT                                                    | Reverse primer for PCR confirmation of <i>rpl-28p::mKate2</i> insertion                                                                                                      |
| MS337  | TTAACTTACAGCTCCTGCACT                                                   | Wt primer for PCR confirmation of <i>rpl-28p::mKate2</i> insertion                                                                                                           |
| MS181  | AGTCTACTACGTCGACCGTC                                                    | Reverse primer for PCR confirmation of Cre removal of HygR                                                                                                                   |
| MS260  | ACGTCTACCACTGGCAAAC                                                     | Wt primer for PCR confirmation of Cre removal of HygR and for Sanger<br>sequencing of <i>sqt-1</i> integration                                                               |
| MS452B | CATAACACGCAAGTTTTACAGAC                                                 | Reverse primer for amplification of <i>sqt-1</i> fragment (6pc)/complexing<br>PCR with 5' homology arm (6 pc)                                                                |
| MS453B | CAGAGATGTCTGTAAACTTGC                                                   | Forward primer for amplification of <i>sqt-1</i> fragment (6pc)                                                                                                              |
| MS454  | CTTGCTAGATCTTCCGATGA                                                    | Reverse primer for amplification of <i>sqt-1</i> fragment (6pc)                                                                                                              |
| MS455  | GACATAGTTGTCATCGGAAGATCT                                                | Forward primer for amplification of <i>sqt-1</i> fragment (6pc) and for Sanger<br>sequencing of <i>sqt-1</i> integration                                                     |
| ZCS169 | ACACCGTCAAGTCTGGAAC                                                     | Reverse primer for amplification of <i>sqt-1</i> fragment (2 and<br>6pc)/complexing PCR with 5' homology arm (2 pc) and for Sanger<br>sequencing of <i>sqt-1</i> integration |
| ZCS170 | ACTCGACGGAGTTCCAGGA                                                     | Forward primer for amplification of <i>sqt-1</i> fragment (2 and<br>6pc)/complexing PCR with 3' homology arm (2 pc) and for Sanger<br>sequencing of <i>sqt-1</i> integration |
| MS456  | TGGCTCTCCGATCTTTCCGA                                                    | Reverse primer for amplification of <i>sqt-1</i> fragment (6pc) and for Sanger<br>sequencing of <i>sqt-1</i> integration                                                     |
| MS457  | TCCGGTCAAATCGGAAAGATC                                                   | Forward primer for amplification of <i>sqt-1</i> fragment (6pc)                                                                                                              |
| MS458  | CTTCTCTGGTCTTCCGTCTG                                                    | Reverse primer for amplification of <i>sqt-1</i> fragment (6pc)                                                                                                              |

|        |                           |                                                                                                                                                                  |
|--------|---------------------------|------------------------------------------------------------------------------------------------------------------------------------------------------------------|
| MS459  | GAGACTGGACCAGACGGAAG      | Forward primer for amplification of <i>sqt-1</i> fragment (6pc)/complexing PCR with 3' homology arm (2 pc) and for Sanger sequencing of <i>sqt-1</i> integration |
| ZCS167 | CACTCGTTTAGGCTATTCCCCTATT | Forward primer for amplification 5' homology arm/complexing PCR with <i>sqt-1</i> fragment                                                                       |
| ZCS172 | TATTGGGAGTCTCCGAACATGGC   | Reverse primer for amplification 3' homology arm/complexing PCR with <i>sqt-1</i> fragment                                                                       |
| MS92   | GTGAACAAGACTCGAGCAAATC    | Forward primer for amplification of 3' homology arm for sanger sequencing                                                                                        |
| ZCS275 | CGTCGGCGCAGGAGTT          | Forward primer for amplification of <i>sqt-1</i> integration                                                                                                     |
| ZCS154 | CGTCGGCGCAGGAGTTG         | Forward primer for amplification of <i>sqt-1</i> integration and for Sanger sequencing                                                                           |
| MS247  | CGTTGAATACTCAGTCAACG      | For Sanger sequencing of <i>sqt-1</i> integration                                                                                                                |

## References:

- Arribere J. A., R. T. Bell, B. X. Fu, K. L. Artiles, P. S. Hartman, *et al.*, 2014 Efficient Marker-Free Recovery of Custom Genetic Modifications with CRISPR/Cas9 in *Caenorhabditis elegans*. *Genetics* 198: genetics.114.169730. <https://doi.org/10.1534/genetics.114.169730>
- Beumer K. J., J. K. Trautman, A. Bozas, J.-L. Liu, J. Rutter, *et al.*, 2008 Efficient gene targeting in *Drosophila* by direct embryo injection with zinc-finger nucleases. *Proc National Acad Sci* 105: 19821–19826. <https://doi.org/10.1073/pnas.0810475105>
- Bindels D. S., L. Haarbosch, L. van Weeren, M. Postma, K. E. Wiese, *et al.*, 2016 mScarlet: a bright monomeric red fluorescent protein for cellular imaging. *Nat Methods* 14: 53–56. <https://doi.org/10.1038/nmeth.4074>
- Böttcher R., M. Hollmann, K. Merk, V. Nitschko, C. Obermaier, *et al.*, 2014 Efficient chromosomal gene modification with CRISPR/cas9 and PCR-based homologous recombination donors in cultured *Drosophila* cells. *Nucleic Acids Res* 42: e89–e89. <https://doi.org/10.1093/nar/gku289>
- Chen C., L. A. Fenk, and M. de Bono, 2013 Efficient genome editing in *Caenorhabditis elegans* by CRISPR-targeted homologous recombination. *Nucleic Acids Res* 41: e193–e193. <https://doi.org/10.1093/nar/gkt805>
- Dickinson D. J., J. D. Ward, D. J. Reiner, and B. Goldstein, 2013 Engineering the *Caenorhabditis elegans* genome using Cas9-triggered homologous recombination. *Nat Methods* 10: 1028–1034. <https://doi.org/10.1038/nmeth.2641>
- Dickinson D. J., A. M. Pani, J. K. Heppert, C. D. Higgins, and B. Goldstein, 2015 Streamlined Genome Engineering with a Self-Excising Drug Selection Cassette. *Genetics* 200: 1035–1049. <https://doi.org/10.1534/genetics.115.178335>
- Doench J. G., N. Fusi, M. Sullender, M. Hegde, E. W. Vaimberg, *et al.*, 2016 Optimized sgRNA design to maximize activity and minimize off-target effects of CRISPR-Cas9. *Nat Biotechnol* 34: 184–191. <https://doi.org/10.1038/nbt.3437>
- Evans, T., 2006 Transformation and microinjection (April 6, 2006), WormBook, ed. The C. elegans Research Community WormBook, <http://www.wormbook.org>.<https://doi.org/10.1895/wormbook.1.108.1>

- Farboud B., and B. J. Meyer, 2015 Dramatic Enhancement of Genome Editing by CRISPR/Cas9 Through Improved Guide RNA Design. *Genetics* 199: 959–971.  
<https://doi.org/10.1534/genetics.115.175166>
- Frøkjær-Jensen C., M. W. Davis, C. E. Hopkins, B. J. Newman, J. M. Thummel, *et al.*, 2008 Single-copy insertion of transgenes in *Caenorhabditis elegans*. *Nat Genet* 40: 1375–1383.  
<https://doi.org/10.1038/ng.248>
- Frøkjær-Jensen C., M. W. Davis, M. Ailion, and E. M. Jorgensen, 2012 Improved Mos1-mediated transgenesis in *C. elegans*. *Nat Methods* 9: 117–118.  
<https://doi.org/10.1038/nmeth.1865>
- Frøkjær-Jensen C., W. M. Davis, M. Sarov, J. Taylor, S. Flibotte, *et al.*, 2014 Random and targeted transgene insertion in *Caenorhabditis elegans* using a modified Mos1 transposon. *Nature Methods* 11: nmeth.2889. <https://doi.org/10.1038/nmeth.2889>
- Giordano-Santini R., S. Milstein, N. Svrzikapa, D. Tu, R. Johnsen, *et al.*, 2010 An antibiotic selection marker for nematode transgenesis. *Nat Methods* 7: 721–723.  
<https://doi.org/10.1038/nmeth.1494>
- Hsu P. D., D. A. Scott, J. A. Weinstein, F. A. Ran, S. Konermann, *et al.*, 2013 DNA targeting specificity of RNA-guided Cas9 nucleases. *Nat Biotechnol* 31: 827–832.  
<https://doi.org/10.1038/nbt.2647>
- Kasimatis K. R., M. J. Moerdyk-Schauwecker, and P. C. Phillips, 2018 Auxin-Mediated Sterility Induction System for Longevity and Mating Studies in *Caenorhabditis elegans*. *G3 Genes Genomes Genetics* 8: g3.200278.2018. <https://doi.org/10.1534/g3.118.200278>
- Kemp B. J., J. Hatzold, L. A. Sternick, J. Cornman-Homonoff, J. M. Whitaker, *et al.*, 2007 In vivo construction of recombinant molecules within the *Caenorhabditis elegans* germ line using short regions of terminal homology. *Nucleic Acids Res* 35: e133–e133.  
<https://doi.org/10.1093/nar/gkm857>
- Kim H., T. Ishidate, K. S. Ghanta, M. Seth, D. Conte, *et al.*, 2014 A Co-CRISPR Strategy for Efficient Genome Editing in *Caenorhabditis elegans*. *Genetics* 197: genetics.114.166389.  
<https://doi.org/10.1534/genetics.114.166389>
- McDiarmid T. A., V. Au, A. D. Loewen, J. Liang, K. Mizumoto, *et al.*, 2018 CRISPR-Cas9 human gene replacement and phenomic characterization in *Caenorhabditis elegans* to understand the functional conservation of human genes and decipher variants of uncertain significance. *Dis Model Mech* 11: dmm036517. <https://doi.org/10.1242/dmm.036517>
- Mello C., J. Kramer, D. Stinchcomb, and V. Ambros, 1991 Efficient gene transfer in *C.elegans*: extrachromosomal maintenance and integration of transforming sequences. *The EMBO journal* 10: 3959–70.

- Mello C., and A. Fire, 1995 Methods in Cell Biology. Methods Cell Biol 48: 451–482.  
[https://doi.org/10.1016/s0091-679x\(08\)61399-0](https://doi.org/10.1016/s0091-679x(08)61399-0)
- Mouridi S., C. Lecroisey, P. Tardy, M. Mercier, A. Leclercq-Blondel, *et al.*, 2017 Reliable CRISPR/Cas9 Genome Engineering in *Caenorhabditis elegans* Using a Single Efficient sgRNA and an Easily Recognizable Phenotype. G3: Genes, Genomes, Genetics 7: 1429–1437. <https://doi.org/10.1534/g3.117.040824>
- Obinata H., A. Sugimoto, and S. Niwa, 2018 Streptothricin acetyl transferase 2 (Sat2): A dominant selection marker for *Caenorhabditis elegans* genome editing. Plos One 13: e0197128. <https://doi.org/10.1371/journal.pone.0197128>
- Paix A., Y. Wang, H. E. Smith, C.-Y. S. Lee, D. Calidas, *et al.*, 2014 Scalable and Versatile Genome Editing Using Linear DNAs with Microhomology to Cas9 Sites in *Caenorhabditis elegans*. Genetics 198: 1347–1356. <https://doi.org/10.1534/genetics.114.170423>
- Paix A., H. Schmidt, and G. Seydoux, 2016 Cas9-assisted recombineering in *C. elegans* : genome editing using in vivo assembly of linear DNAs. Nucleic Acids Res 44: gkw502. <https://doi.org/10.1093/nar/gkw502>
- Philip N. S., F. Escobedo, L. L. Bahr, B. J. Berry, and A. P. Wojtovich, 2019 Mos1 Element-Mediated CRISPR Integration of Transgenes in *Caenorhabditis elegans*. G3 Genes Genomes Genetics 9: 2629–2635. <https://doi.org/10.1534/g3.119.400399>
- Praitis V., E. Casey, D. Collar, and J. Austin, 2001 Creation of low-copy integrated transgenic lines in *Caenorhabditis elegans*. Genetics 157: 1217–26.
- Radman I., S. Greiss, and J. W. Chin, 2013 Efficient and Rapid *C. elegans* Transgenesis by Bombardment and Hygromycin B Selection. Plos One 8: e76019. <https://doi.org/10.1371/journal.pone.0076019>
- Seidel H. S., M. Ailion, J. Li, A. van Oudenaarden, M. V. Rockman, *et al.*, 2011 A Novel Sperm-Delivered Toxin Causes Late-Stage Embryo Lethality and Transmission Ratio Distortion in *C. elegans*. Plos Biol 9: e1001115. <https://doi.org/10.1371/journal.pbio.1001115>
- Semple J. I., R. Garcia-Verdugo, and B. Lehner, 2010 Rapid selection of transgenic *C. elegans* using antibiotic resistance. Nat Methods 7: 725–727. <https://doi.org/10.1038/nmeth.1495>
- Semple J. I., L. Biondini, and B. Lehner, 2012 Generating transgenic nematodes by bombardment and antibiotic selection. Nat Methods 9: 118–119. <https://doi.org/10.1038/nmeth.1864>
- Silva-García C. G., A. Lanjuin, C. Heintz, S. Dutta, N. M. Clark, *et al.*, 2019 Single-Copy Knock-In Loci for Defined Gene Expression in *Caenorhabditis elegans*. G3 Genes Genomes Genetics 9: g3.400314.2019. <https://doi.org/10.1534/g3.119.400314>



- Stinchcomb D., J. Shaw, S. Carr, and D. Hirsh, 1985 Extrachromosomal DNA transformation of *Caenorhabditis elegans*. *Molecular and Cellular Biology* 5: 3484–3496.  
<https://doi.org/10.1128/mcb.5.12.3484>
- Waaijers S., V. Portegijs, J. Kerver, B. B. L. G. Lemmens, M. Tijsterman, *et al.*, 2013 CRISPR/Cas9-targeted mutagenesis in *Caenorhabditis elegans*. *Genetics* 195: 1187–91.  
<https://doi.org/10.1534/genetics.113.156299>
- Ward J. D., 2015 Rapid and Precise Engineering of the *Caenorhabditis elegans* Genome with Lethal Mutation Co-Conversion and Inactivation of NHEJ Repair. *Genetics* 199: 363–377.  
<https://doi.org/10.1534/genetics.114.172361>
- Woglar A., K. Yamaya, B. Roelens, A. Boettiger, S. Kohler, *et al.*, 2019 Quantitative Cytogenetics Reveals the Longitudinal Architecture of Meiotic Chromosome Axes. *Biorxiv* 724997. <https://doi.org/10.1101/724997>
- Xu H., T. Xiao, C.-H. Chen, W. Li, C. A. Meyer, *et al.*, 2015 Sequence determinants of improved CRISPR sgRNA design. *Genome Res* 25: 1147–1157.  
<https://doi.org/10.1101/gr.191452.115>
- Yoshimura J., K. Ichikawa, M. J. Shoura, K. L. Artiles, I. Gabdank, *et al.*, 2019 Recompleting the *Caenorhabditis elegans* genome. *Genome Res* 29: 1009–1022.  
<https://doi.org/10.1101/gr.244830.118>
